# Supplementary material
Source: publisher site journal article supplement (https://www.dovepress.com/article/455021)
Supplement: Supplementary file 1 [file get_supplementary_file.php]

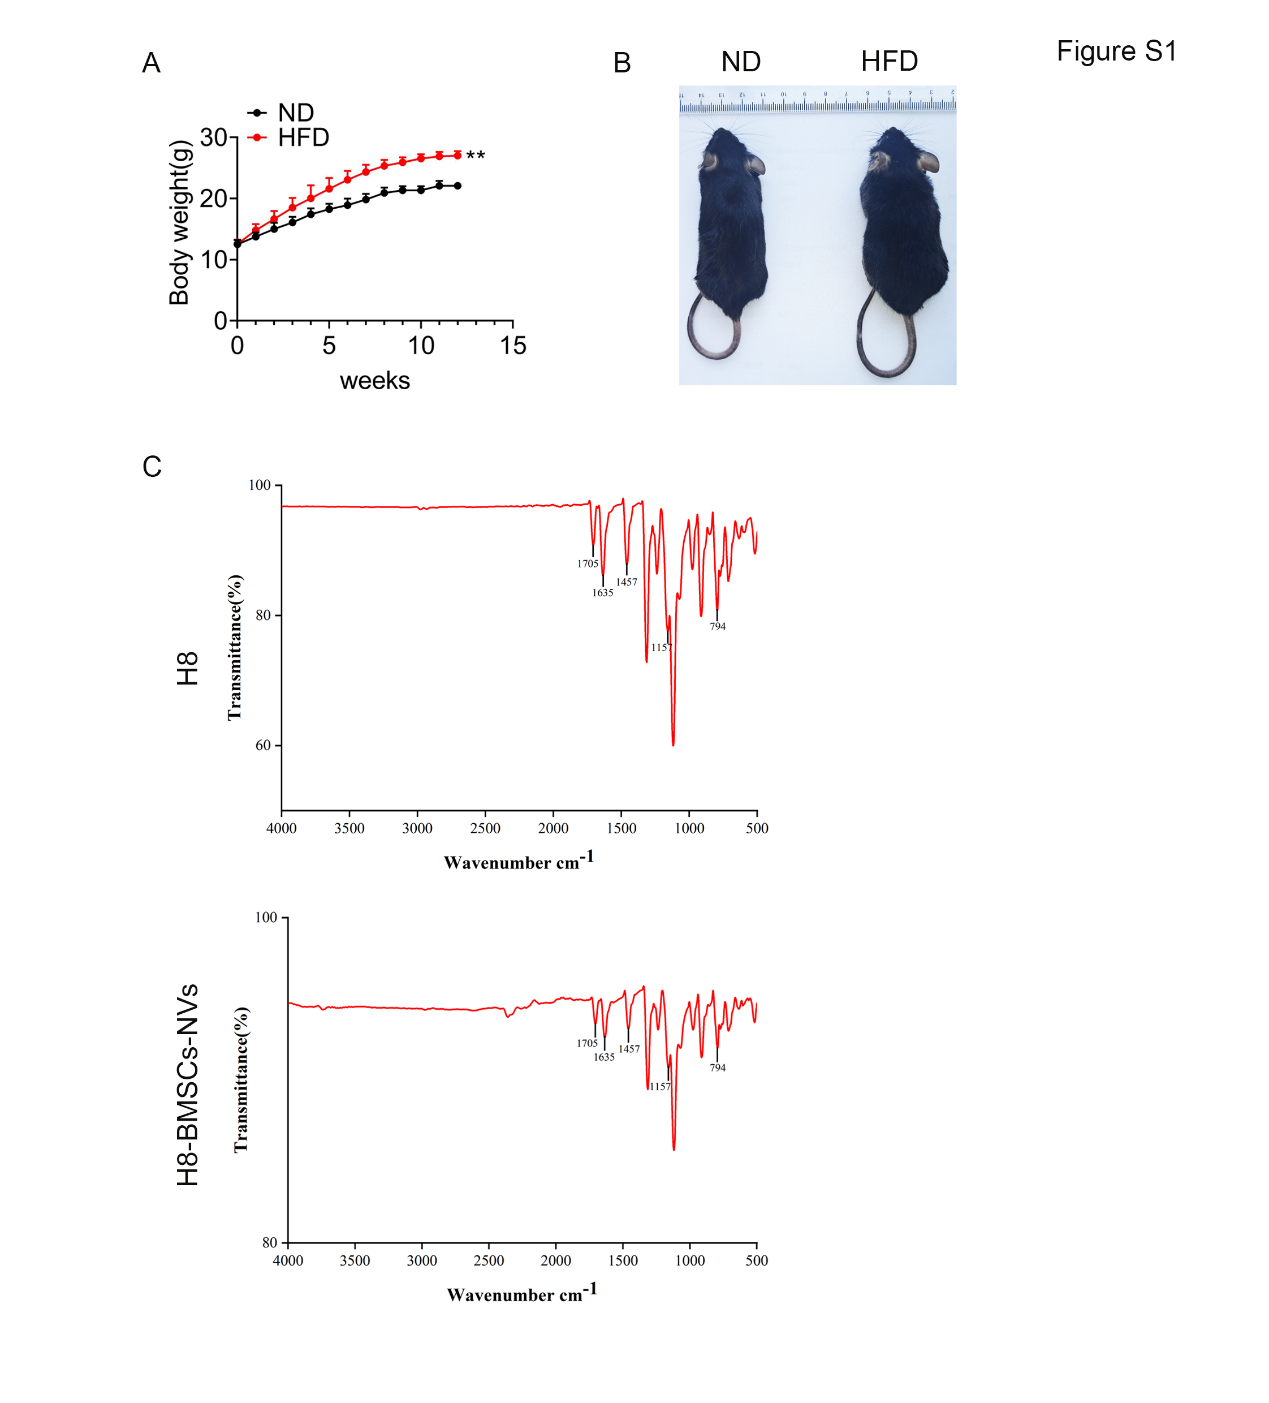


Figure S1. C57BL/6J mice were fed normal diet and high-fat diet (HFD) for 12 weeks. (A) The change of body weight. (B) Representative images of mice. All the results are expressed as the mean ± SD (n = 6 mice per group, ** P<0.01). (C) FTIR spectra of H8 and H8-BMSCs-NVs. 1: 1.


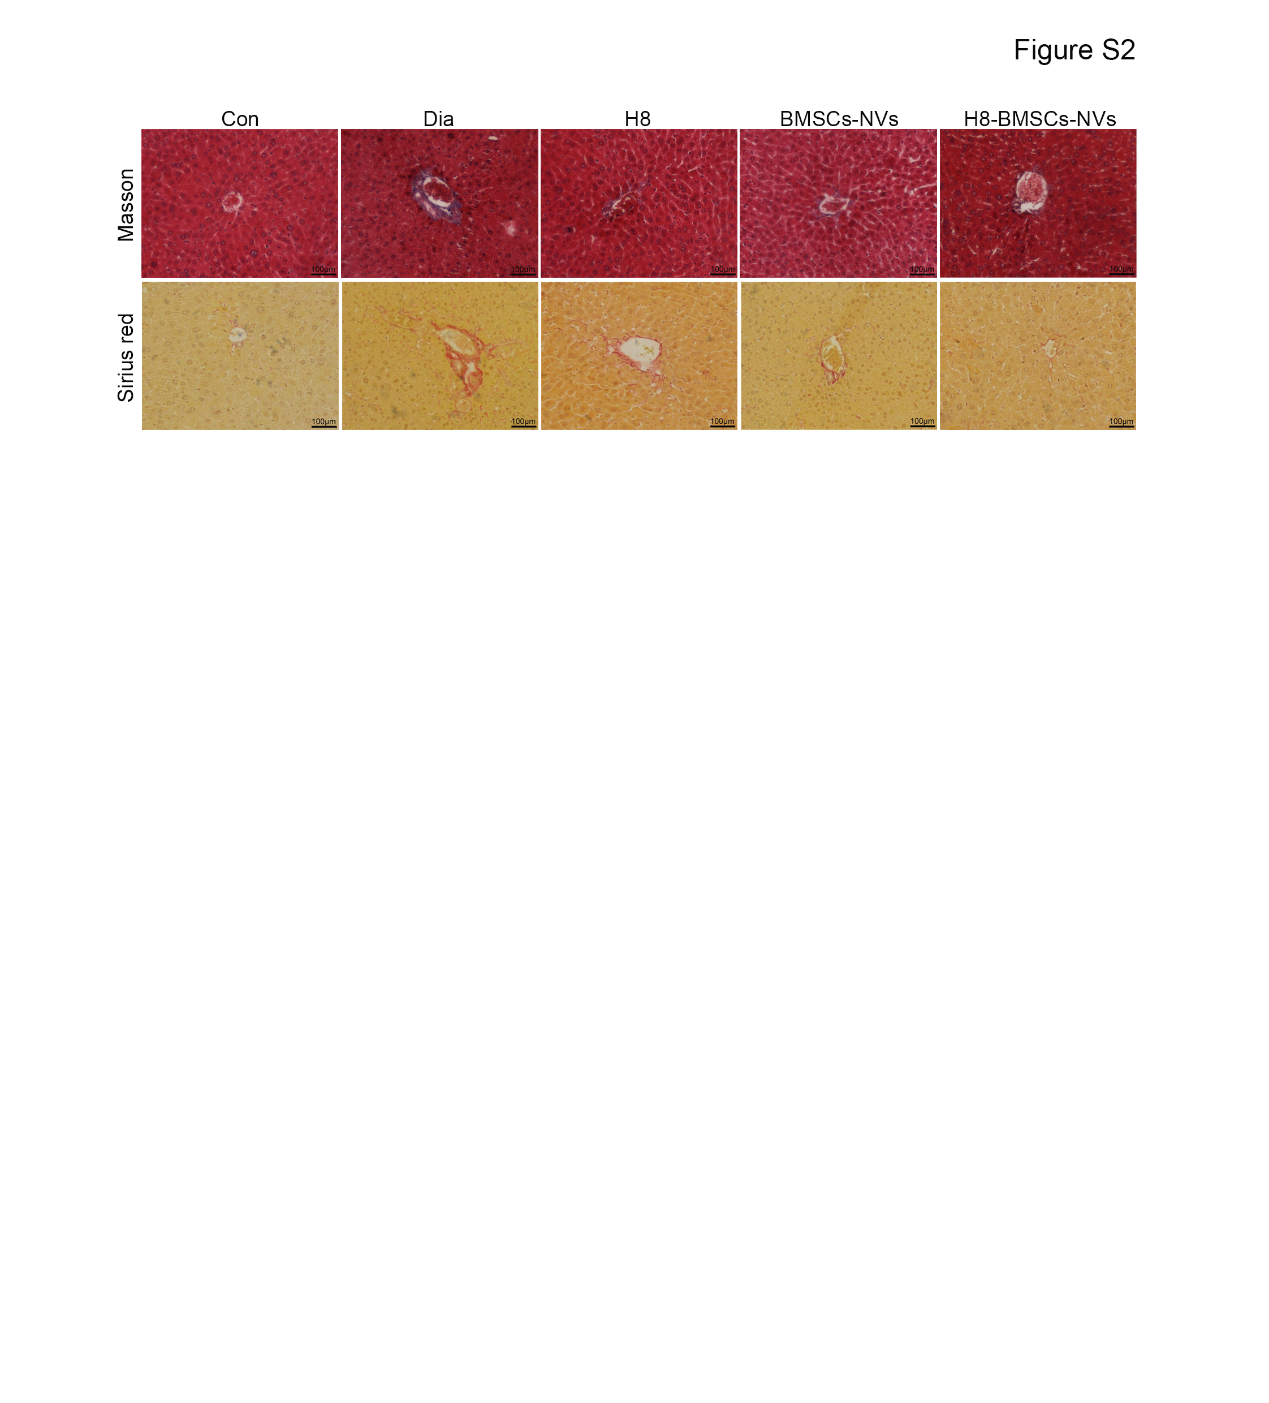


Figure S2. C57BL/6J male mice were induced T2D by HFD/STZ and treated with H8, BMSCs-NVs and H8-BMSCs-NVs for 8 weeks. Masson and Sirius red staining of liver sections in different groups of mice (Scale bar = 100 µm).


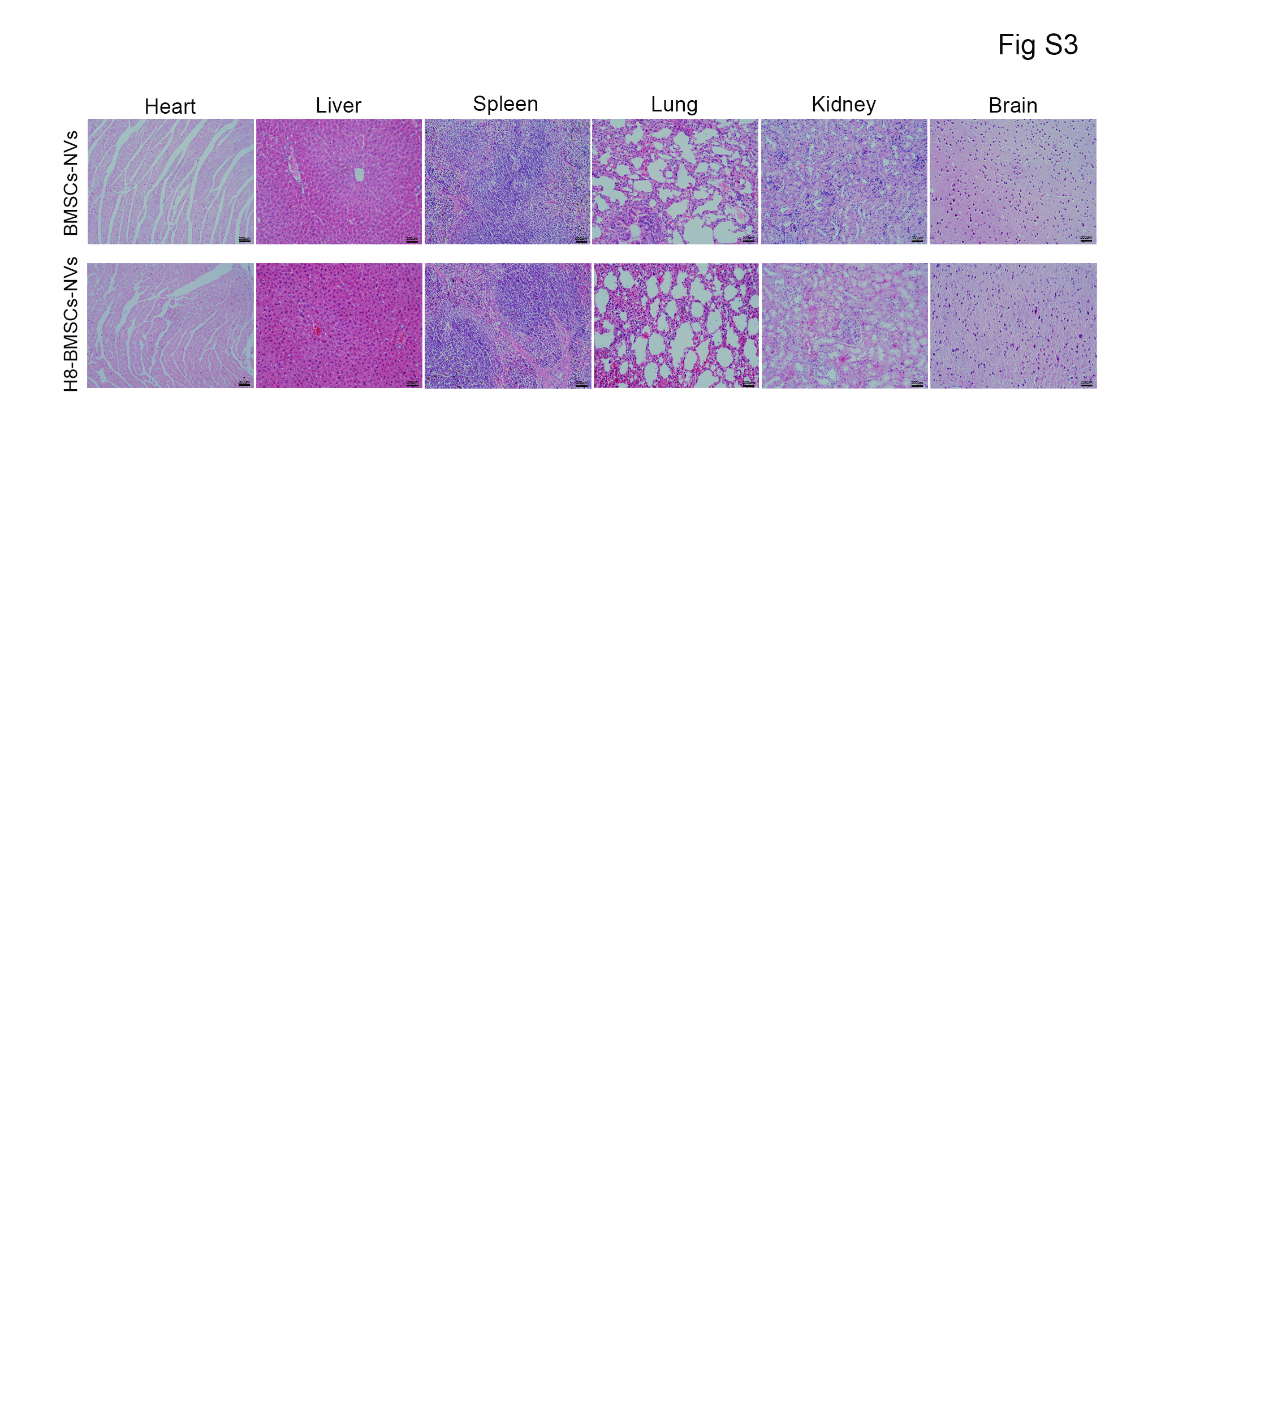


Figure S3. H&E staining of the heart, liver, spleen, lung, kidney and brain after BMSCs-NVs and H8-BMSCs-NVs (Scale bar = 200 µm).


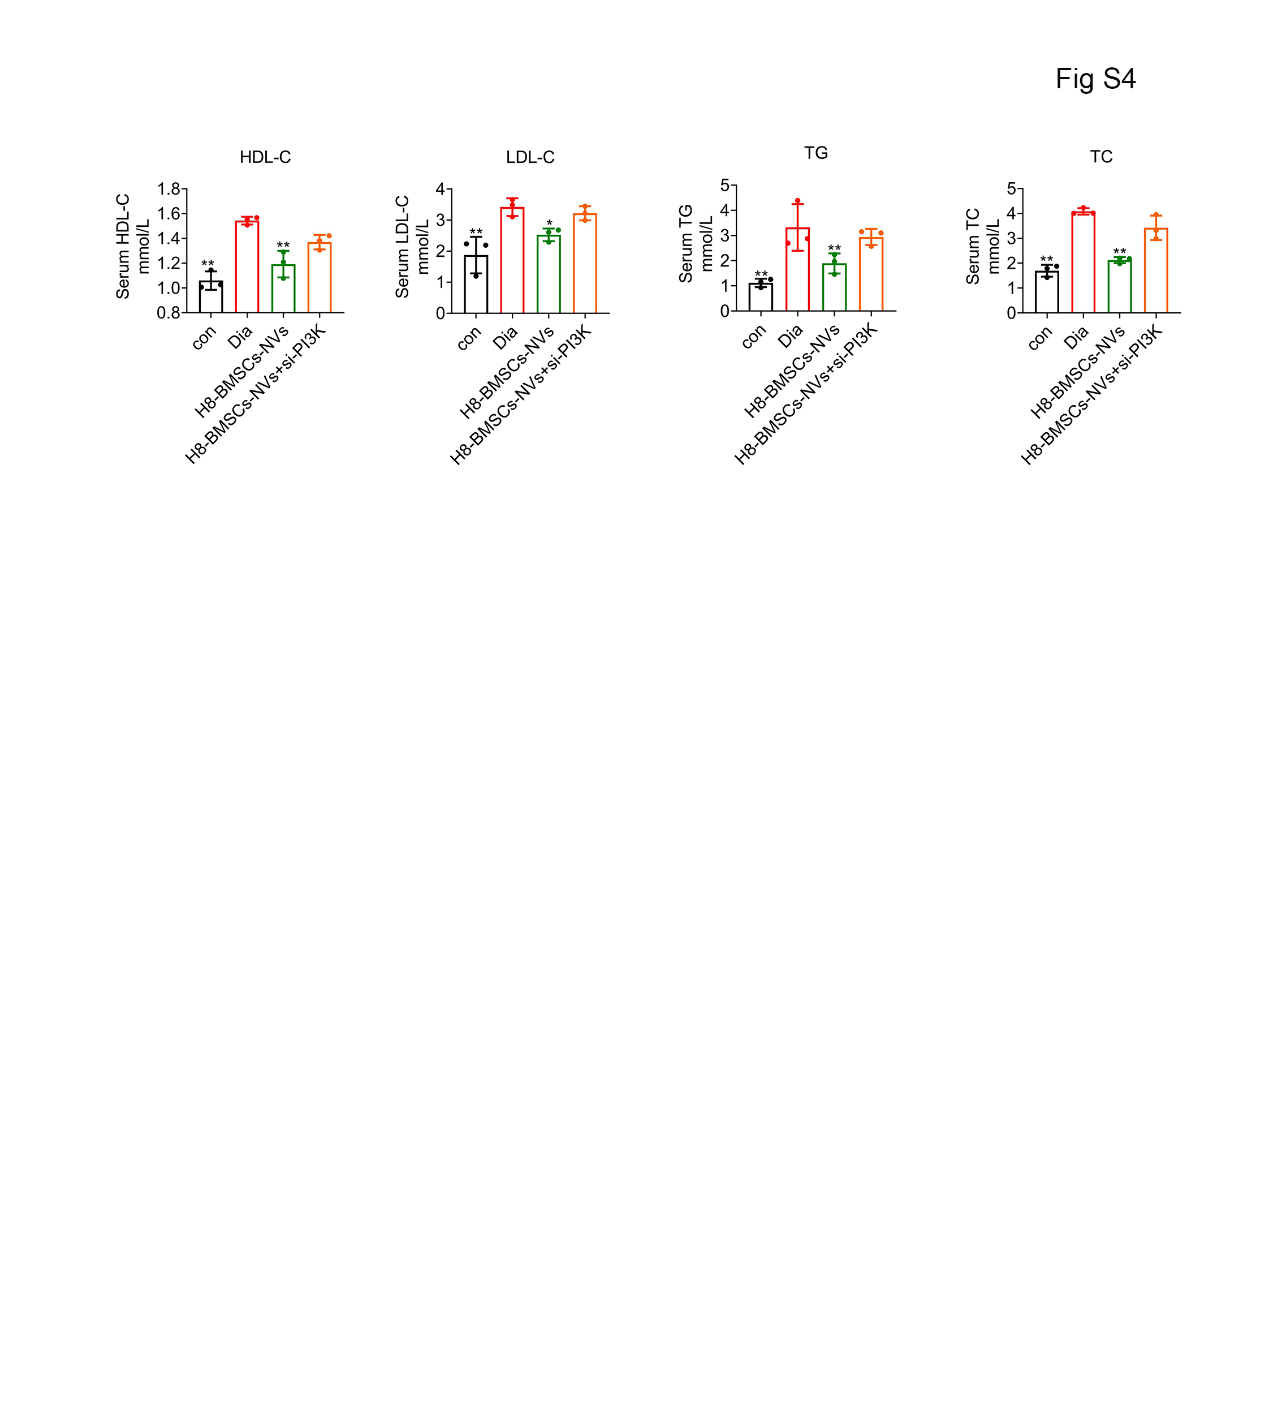


Figure S4. Serum HDL-C, LDL-C, TG, and TC levels (n = 3 mice per group, *P<0.05, **P<0.01, vs. Dia).
